# Supplementary material for: Anderson-type polyoxometalate-based complexes constructed from a new ‘V’-like bis-pyridine–bis-amide ligand for selective adsorption of organic dyes and detection of Cr(vi) and Fe(iii) ions
Source: Royal Society of Chemistry journal article supplement (doi:10.1039/d1qi00785h), 2021-01-01
Supplement: d1qi00785h1.pdf [file d1qi00785h1.pdf]

## Supporting Information

### Anderson-type Polyoxometalate-based Complexes constructed from a new 'V'-like Bis-pyridine-bis-amide Ligand for Selective Adsorption of Organic Dyes and Detection of Cr(VI) and Fe(III) ions

Yue Zhang, Xiang Wang\*, Yue Wang, Lei Li, Na Xu, XiuLi Wang\*

†College of Chemistry and Materials Engineering, Bohai University, Liaoning Professional Technology Innovation Center of Liaoning Province for Conversion Materials of Solar Cell, Jinzhou 121013, P. R. China

#### Calculation of Capacity

Equation 1 was used to calculate the removal percentage of the dye.<sup>1</sup>

$$R\% = \left[ \frac{A_0 - A_t}{A_0} \right] \times 100 \quad (1)$$

$A_0$  is the absorbance of the dye solution before the adsorption process; and  $A_t$  is the absorbance of the dye solution after the adsorption process.

Table S1 Crystallographic data of complexes 1–4.

| Complex                  | 1                                                                                    | 2                                                                                    | 3                                                                                    | 4                                                                                    |
|--------------------------|--------------------------------------------------------------------------------------|--------------------------------------------------------------------------------------|--------------------------------------------------------------------------------------|--------------------------------------------------------------------------------------|
| Empirical formula        | C <sub>25</sub> H <sub>42</sub> Al Mo <sub>6</sub> N <sub>4</sub> O <sub>33</sub> Zn | C <sub>25</sub> H <sub>42</sub> Cr Mo <sub>6</sub> N <sub>4</sub> O <sub>33</sub> Zn | C <sub>25</sub> H <sub>42</sub> Al Mo <sub>6</sub> N <sub>4</sub> O <sub>33</sub> Co | C <sub>25</sub> H <sub>41</sub> Cr Mo <sub>6</sub> N <sub>4</sub> O <sub>33</sub> Co |
| Formula weight           | 1587.56                                                                              | 1618.63                                                                              | 1580.11                                                                              | 1611.18                                                                              |
| Crystal system           | Triclinic                                                                            | Triclinic                                                                            | Triclinic                                                                            | Triclinic                                                                            |
| Space group              | P-1                                                                                  | P-1                                                                                  | P-1                                                                                  | P-1                                                                                  |
| a (Å)                    | 7.0868(3)                                                                            | 7.0922(5)                                                                            | 7.0769(2)                                                                            | 7.0857(16)                                                                           |
| b (Å)                    | 16.8438(8)                                                                           | 16.8866(11)                                                                          | 16.8679(5)                                                                           | 16.920(4)                                                                            |
| c (Å)                    | 19.4954(10)                                                                          | 19.5181(13)                                                                          | 19.4622(6)                                                                           | 19.487(5)                                                                            |
| α (°)                    | 104.629(1)                                                                           | 104.652(1)                                                                           | 104.602(1)                                                                           | 104.599(5)                                                                           |
| β (°)                    | 95.856(1)                                                                            | 95.839(2)                                                                            | 96.266(1)                                                                            | 96.239(5)                                                                            |
| γ (°)                    | 99.846(1)                                                                            | 99.950(1)                                                                            | 99.599(1)                                                                            | 99.634(5)                                                                            |
| V (Å <sup>3</sup> )      | 2192.64(18)                                                                          | 2201.4(3)                                                                            | 2188.73(11)                                                                          | 2200.9(9)                                                                            |
| Z                        | 2                                                                                    | 2                                                                                    | 2                                                                                    | 2                                                                                    |
| Dc (g cm <sup>-3</sup> ) | 2.405                                                                                | 2.442                                                                                | 2.398                                                                                | 2.431                                                                                |
| μ (mm <sup>-1</sup> )    | 2.330                                                                                | 2.535                                                                                | 2.166                                                                                | 2.367                                                                                |
| F (000)                  | 1544                                                                                 | 1578                                                                                 | 1536                                                                                 | 1570                                                                                 |
| Reflection collected     | 14808                                                                                | 13093                                                                                | 31457                                                                                | 16288                                                                                |
| Unique reflections       | 9429                                                                                 | 8053                                                                                 | 10256                                                                                | 10769                                                                                |
| parameters               | 653                                                                                  | 653                                                                                  | 665                                                                                  | 655                                                                                  |
| Rint                     | 0.039                                                                                | 0.0367                                                                               | 0.0245                                                                               | 0.035                                                                                |

|                                                                                                                |        |        |        |        |
|----------------------------------------------------------------------------------------------------------------|--------|--------|--------|--------|
| GOF                                                                                                            | 0.984  | 1.005  | 1.090  | 0.994  |
| $R_I^a [I \geq \alpha(I)]$                                                                                     | 0.0425 | 0.0426 | 0.0525 | 0.0465 |
| $wR_2^b$ (all date)                                                                                            | 0.0862 | 0.0934 | 0.1096 | 0.1021 |
| $^a R_I = \sum   F_o  -  F_c   / \sum  F_o $ ; $^b wR_2 = \sum [w(F_o^2 - F_c^2)^2] / \sum [w(F_o^2)^2]^{1/2}$ |        |        |        |        |

**Table S2** Selected bond distances (Å) and angles (°) of complexes **1–4**.

| <b>Complex 1</b>                                                                    |            |                    |            |
|-------------------------------------------------------------------------------------|------------|--------------------|------------|
| Zn(1)-O(3)#3                                                                        | 2.221(4)   | Zn(1)-O(2)         | 2.030(4)   |
| Zn(1)-O(1W)                                                                         | 2.135(4)   | Zn(1)-O(1)         | 2.131(4)   |
| Zn(1)-O(2W)                                                                         | 2.058(4)   | Zn(1)-N(1)         | 2.069(5)   |
| O(1W)-Zn(1)-O(3)#3                                                                  | 91.20(18)  | O(1)-Zn(1)-O(3)#3  | 169.66(16) |
| O(2W)-Zn(1)-O(3)#3                                                                  | 83.46(17)  | O(1)-Zn(1)-O(1W)   | 99.13(18)  |
| O(2W)-Zn(1)-O(1W)                                                                   | 168.32(17) | N(1)-Zn(1)-O(3)#3  | 90.35(17)  |
| O(2W)-Zn(1)-O(1)                                                                    | 86.28(17)  | N(1)-Zn(1)-O(1W)   | 90.29(18)  |
| O(2W)-Zn(1)-N(1)                                                                    | 100.09(18) | N(1)-Zn(1)-O(1)    | 90.16(18)  |
| O(2)-Zn(1)-O(3)#3                                                                   | 83.53(16)  | O(2)-Zn(1)-O(1)    | 97.60(16)  |
| O(2)-Zn(1)-O(1W)                                                                    | 80.19(16)  | O(2)-Zn(1)-N(1)    | 168.54(19) |
| O(2)-Zn(1)-O(2W)                                                                    | 88.87(17)  |                    |            |
| Symmetry codes for 1: #1 -x, -y+1, -z+2    #2 -x, -y, -z+1    #3 -x+1, -y+1, -z+2   |            |                    |            |
| <b>Complex 2</b>                                                                    |            |                    |            |
| Zn(1)-O(3)#3                                                                        | 2.220(5)   | Zn(1)-O(1)         | 2.125(5)   |
| Zn(1)-O(2W)                                                                         | 2.062(5)   | Zn(1)-O(1W)        | 2.141(5)   |
| Zn(1)-O(2)                                                                          | 2.022(5)   | Zn(1)-N(1)         | 2.061(6)   |
| O(2W)-Zn(1)-O(3)#3                                                                  | 83.83(19)  | N(1)-Zn(1)-O(3)#3  | 90.9(2)    |
| O(2W)-Zn(1)-O(1)                                                                    | 86.1(2)    | N(1)-Zn(1)-O(2W)   | 99.7(2)    |
| O(2W)-Zn(1)-O(1W)                                                                   | 168.5(2)   | N(1)-Zn(1)-O(1)    | 89.6(2)    |
| O(2)-Zn(1)-O(3)#3                                                                   | 83.21(19)  | N(1)-Zn(1)-O(1W)   | 90.5(2)    |
| O(2)-Zn(1)-O(2W)                                                                    | 89.1(2)    | O(1)-Zn(1)-O(3)#3  | 169.90(19) |
| O(2)-Zn(1)-O(1)                                                                     | 97.8(2)    | O(1)-Zn(1)-O(1W)   | 99.4(2)    |
| O(2)-Zn(1)-O(1W)                                                                    | 80.1(2)    | O(1W)-Zn(1)-O(3)#3 | 90.7(2)    |
| O(2)-Zn(1)-N(1)                                                                     | 168.9(2)   |                    |            |
| Symmetry codes for 2: #1 -x, -y+2, -z+2    #2 -x, -y+1, -z+1    #3 -x+1, -y+2, -z+2 |            |                    |            |
| <b>Complex 3</b>                                                                    |            |                    |            |
| Co(1)-O(3)#3                                                                        | 2.131(5)   | Co(1)-O(1W)        | 2.111(5)   |
| Co(1)-O(1)                                                                          | 2.035(5)   | Co(1)-O(2)         | 2.124(5)   |
| Co(1)-O(2W)                                                                         | 2.074(5)   | Co(1)-N(1)         | 2.090(6)   |
| O(1)-Co(1)-O(2W)                                                                    | 90.5(2)    | N(1)-Co(1)-O(1W)   | 90.4(2)    |
| O(1)-Co(1)-O(1W)                                                                    | 82.0(2)    | N(1)-Co(1)-O(2)    | 88.1(2)    |
| O(1)-Co(1)-O(2)                                                                     | 97.2(2)    | O(2W)-Co(1)-N(1)   | 96.9(2)    |
| O(1)-Co(1)-N(1)                                                                     | 171.3(2)   | O(1W)-Co(1)-O(3)#3 | 91.9(2)    |
| O(2W)-Co(1)-O(3)#3                                                                  | 84.62(19)  | O(1W)-Co(1)-O(2)   | 98.9(2)    |

|                                                                                             |          |                   |          |
|---------------------------------------------------------------------------------------------|----------|-------------------|----------|
| O(2W)-Co(1)-O(1W)                                                                           | 172.0(2) | O(2)-Co(1)-O(3)#3 | 169.2(2) |
| O(2W)-Co(1)-O(2)                                                                            | 84.8(2)  | N(1)-Co(1)-O(3)#3 | 90.8(2)  |
| Symmetry codes for <b>3</b> : #1 -x+2, -y+1, -z    #2 -x+2, -y+2, -z+1    #3 -x+1, -y+1, -z |          |                   |          |

#### Complex 4

|                                                                                                      |            |                    |            |
|------------------------------------------------------------------------------------------------------|------------|--------------------|------------|
| Co(1)-O(1W)                                                                                          | 2.057(4)   | Co(1)-O(1)         | 2.123(4)   |
| Co(1)-O(2)#3                                                                                         | 2.141(4)   | Co(1)-O(2W)        | 2.113(4)   |
| Co(1)-O(7)                                                                                           | 2.032(4)   | Co(1)-N(1)         | 2.093(5)   |
| O(1W)-Co(1)-O(2)#3                                                                                   | 84.70(16)  | N(1)-Co(1)-O(2)#3  | 90.46(17)  |
| O(1W)-Co(1)-O(1)                                                                                     | 85.16(16)  | N(1)-Co(1)-O(1)    | 88.30(18)  |
| O(1W)-Co(1)-O(2W)                                                                                    | 171.64(17) | N(1)-Co(1)-O(2W)   | 90.28(19)  |
| O(1W)-Co(1)-N(1)                                                                                     | 97.2(2)    | O(7)-Co(1)-N(1)    | 171.48(19) |
| O(7)-Co(1)-O(1W)                                                                                     | 89.71(18)  | O(1)-Co(1)-O(2)#3  | 169.55(16) |
| O(7)-Co(1)-O(2)#3                                                                                    | 85.15(16)  | O(2W)-Co(1)-O(2)#3 | 91.47(18)  |
| O(7)-Co(1)-O(1)                                                                                      | 97.33(17)  | O(2W)-Co(1)-O(1)   | 98.91(18)  |
| O(7)-Co(1)-O(2W)                                                                                     | 82.55(17)  |                    |            |
| Symmetry codes for <b>4</b> : #1 -x, -y+2, -z+2    #2 -x, -y+1, -z+1    #3 x+1, y, z<br>#4 x-1, y, z |            |                    |            |

**Table S3** The charges and sizes of the selected organic dyes

| Name               | Cationic                                                                            |                                                                                     |                                                                                      |                                                                                       | Anionic                                                                               |
|--------------------|-------------------------------------------------------------------------------------|-------------------------------------------------------------------------------------|--------------------------------------------------------------------------------------|---------------------------------------------------------------------------------------|---------------------------------------------------------------------------------------|
|                    | CV                                                                                  | MB                                                                                  | NR                                                                                   | RhB                                                                                   | MO                                                                                    |
| Structural formula | 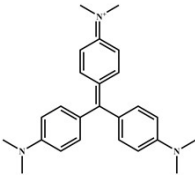 |  |  |  |  |
| Charge             | +1                                                                                  | +1                                                                                  | +1                                                                                   | +1                                                                                    | -1                                                                                    |
| x(Å)               | 3.5                                                                                 | 1.8                                                                                 | 3.8                                                                                  | 6.8                                                                                   | 4.5                                                                                   |
| y(Å)               | 13.0                                                                                | 5.5                                                                                 | 6.9                                                                                  | 11.8                                                                                  | 6.0                                                                                   |
| z(Å)               | 13.7                                                                                | 14.2                                                                                | 14.8                                                                                 | 15.8                                                                                  | 14.8                                                                                  |

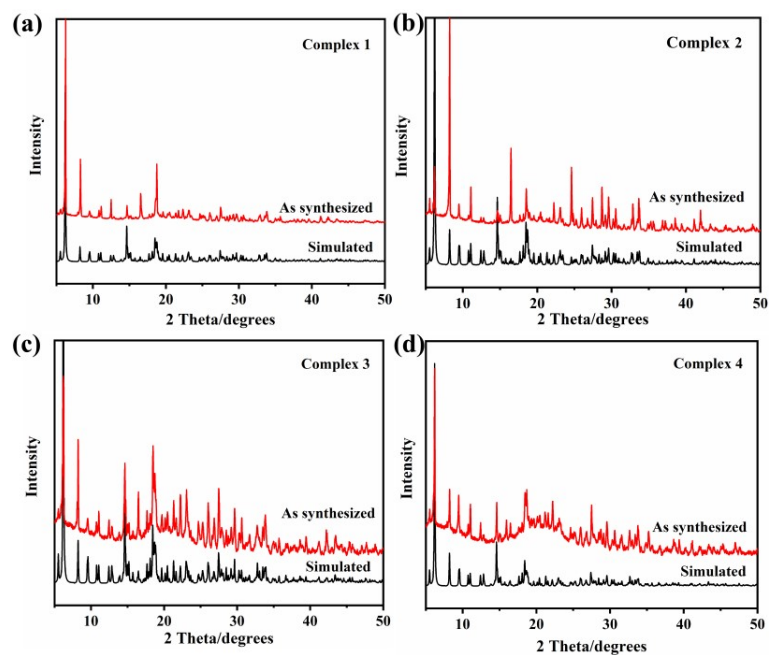

**Fig. S1.** The PXRD patterns of complexes 1–4.

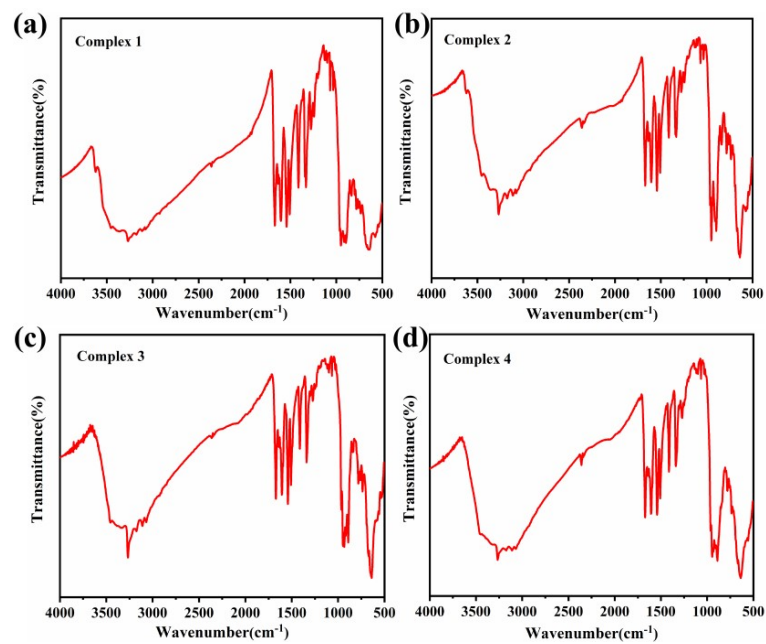

**Fig. S2.** The IR spectra of complexes 1–4.

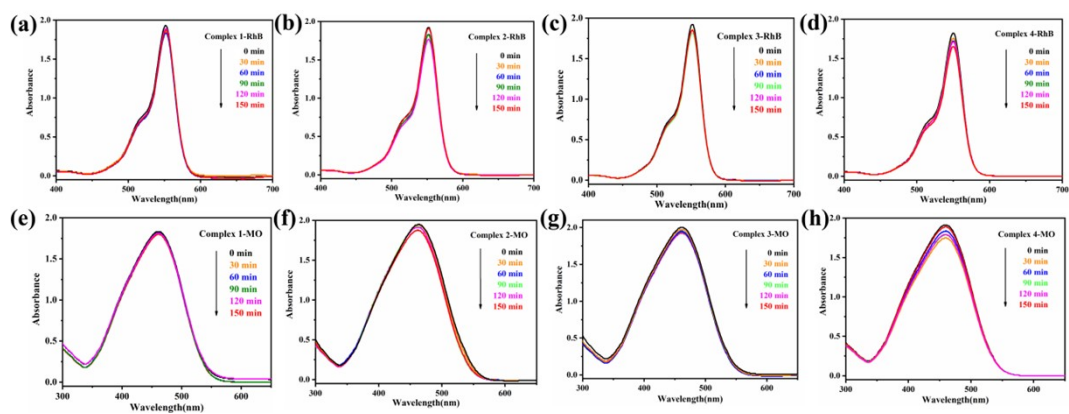

Fig. S3. UV/vis spectra of the (a-d) RhB and (e-h) MO in the presence of complexes 1–4.

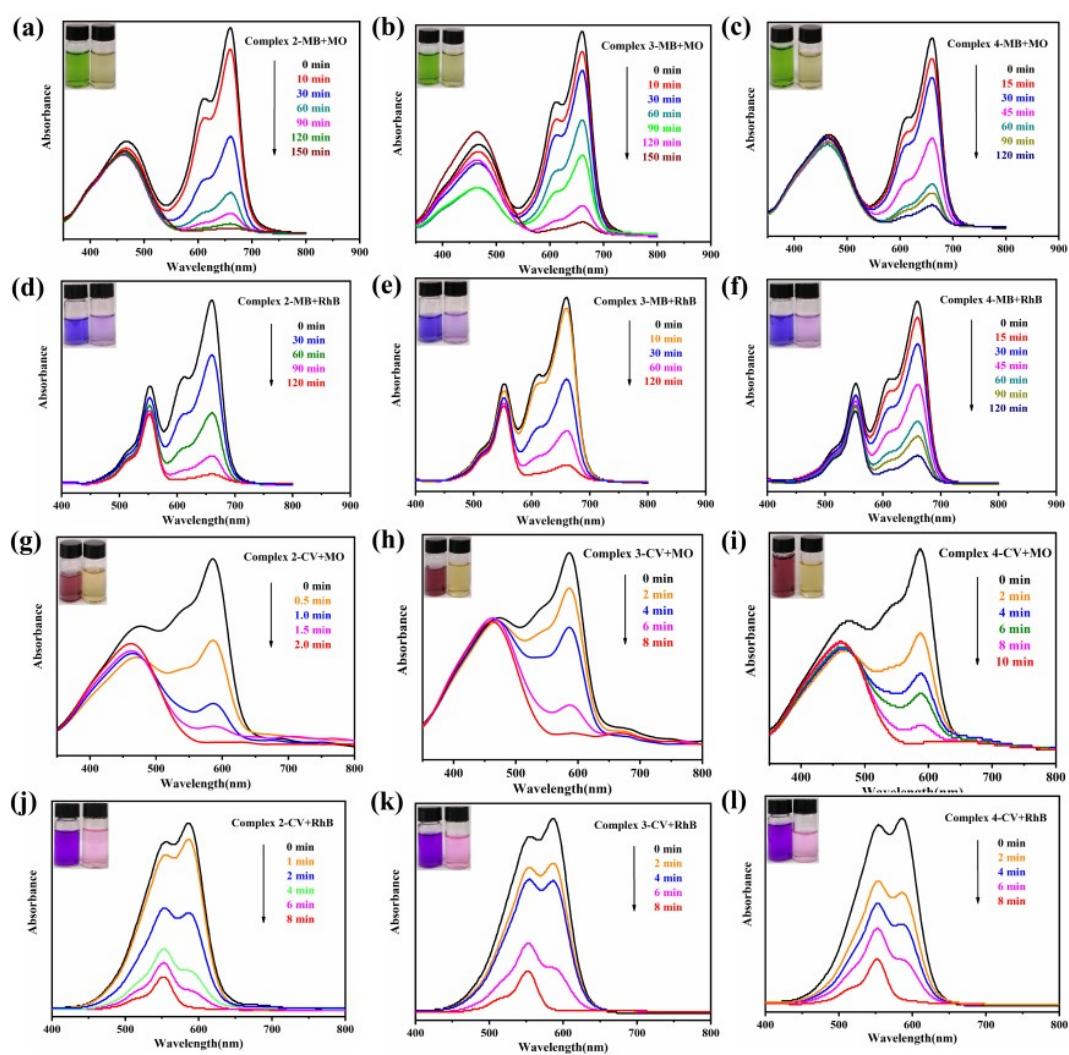

Fig. S4. UV/vis spectra of complexes 2–4 in the adsorption process of mixed dyes solution. The illustration showed the color change of the dye solutions before (left) and after (right) dye adsorption.

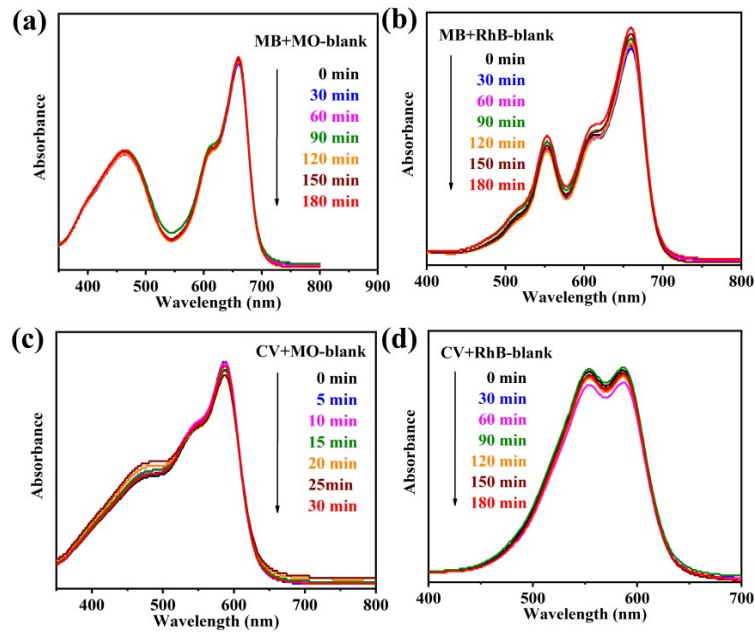

**Fig. S5.** UV/vis spectra of the binary mixed dyes without adsorbents. MB/MO (a), MB/ RhB (b), CV/MO (c) and CV/ RhB (d).

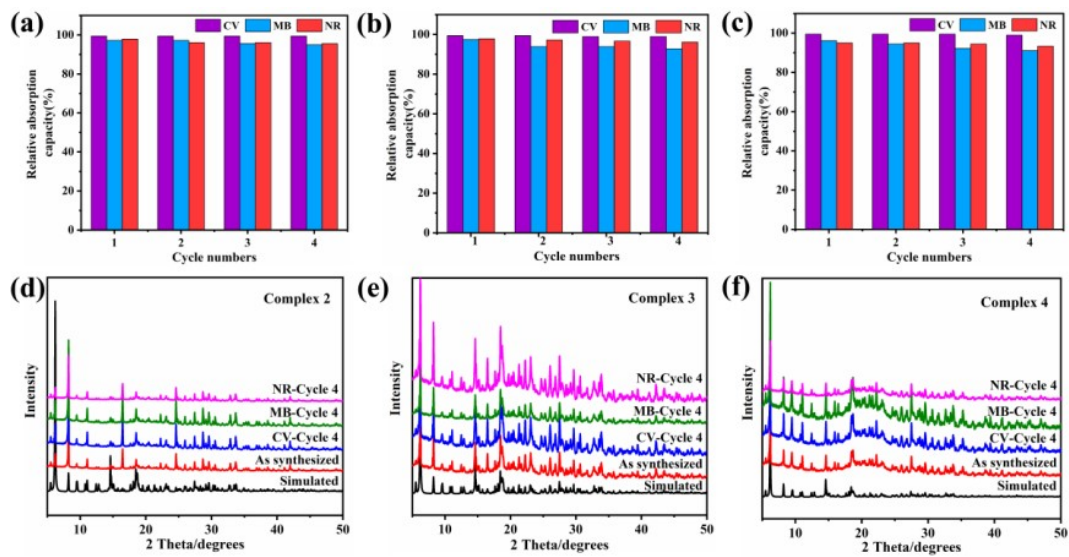

**Fig. S6.** (a-c) Four cycles of adsorption test of complexes 2–4 for CV, MB, and NR. (b-f) PXRD pattern of complexes 2–4 after four cycles of adsorption test.

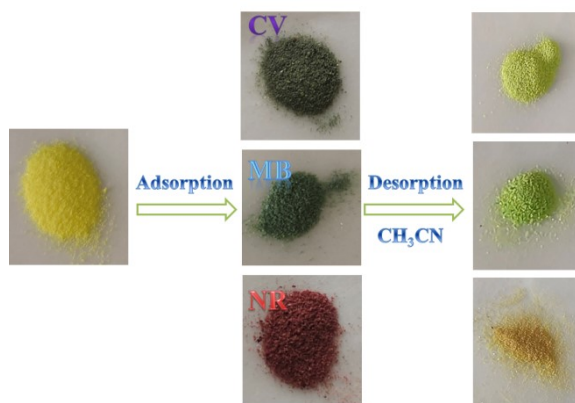

**Fig. S7.** The color change after adsorbing CV, MB, NR of **1** as adsorbent.

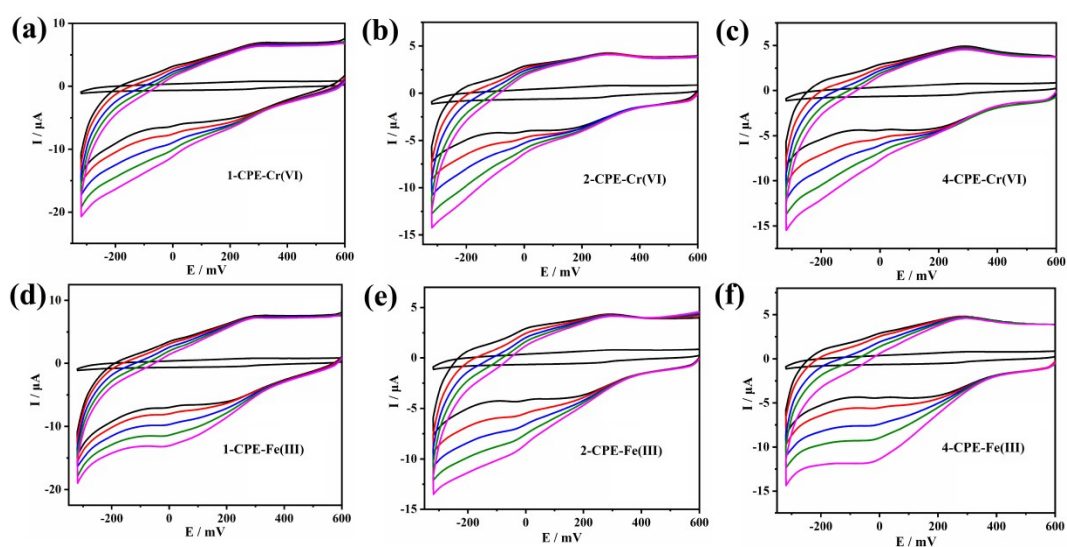

**Fig. S8.** (a-f) The cyclic voltammograms of 1-, 2-, 4-CPE in electrolyte solution containing Cr(VI) ions and Fe(III) ions.

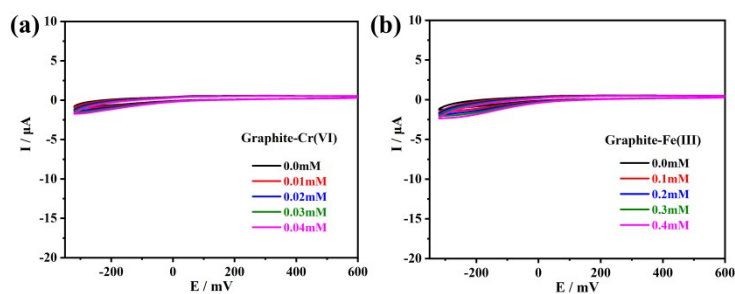

**Fig. S9.** The cyclic voltammograms of the bare-CPE in electrolyte solution containing Cr(VI) or Fe(III) ions.

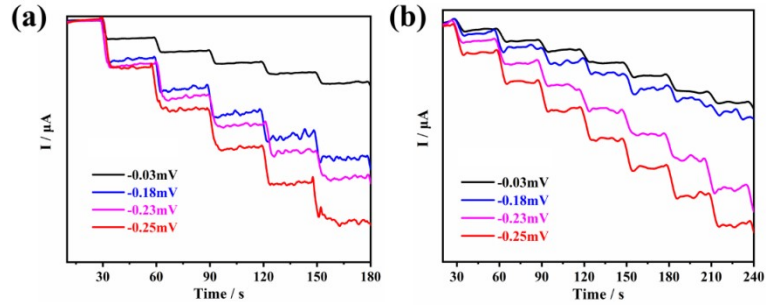

**Fig. S10.** The best potential of amperometric detection of (a) Cr(VI) ions and (b) Fe(III) ions for 3-CPE.

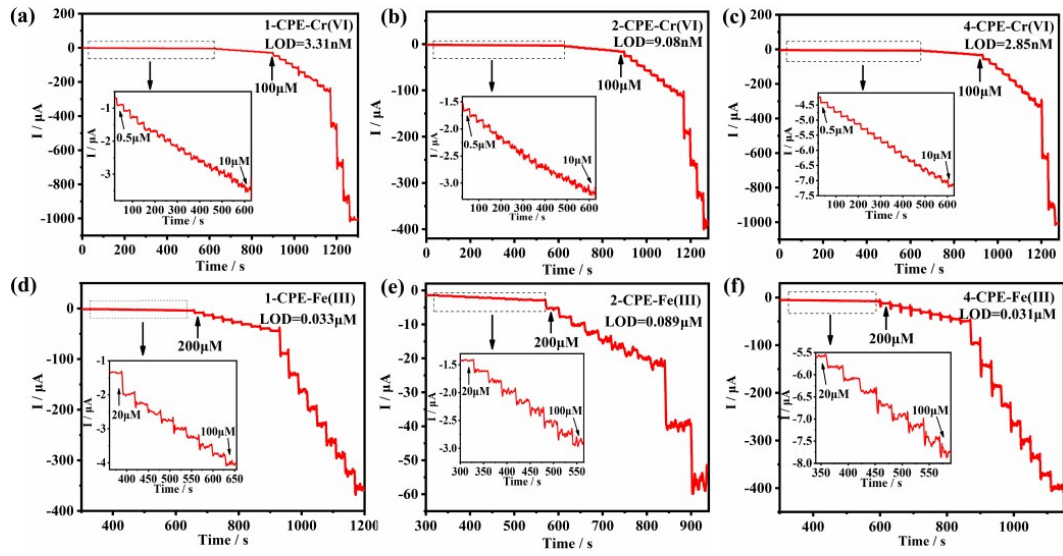

**Fig. S11.** Current response of 1-, 2-, 4-CPE when (a-c) Cr(VI) ions and (d-f) Fe(III) ions are continuously added to electrolyte solution at -0.25 V.

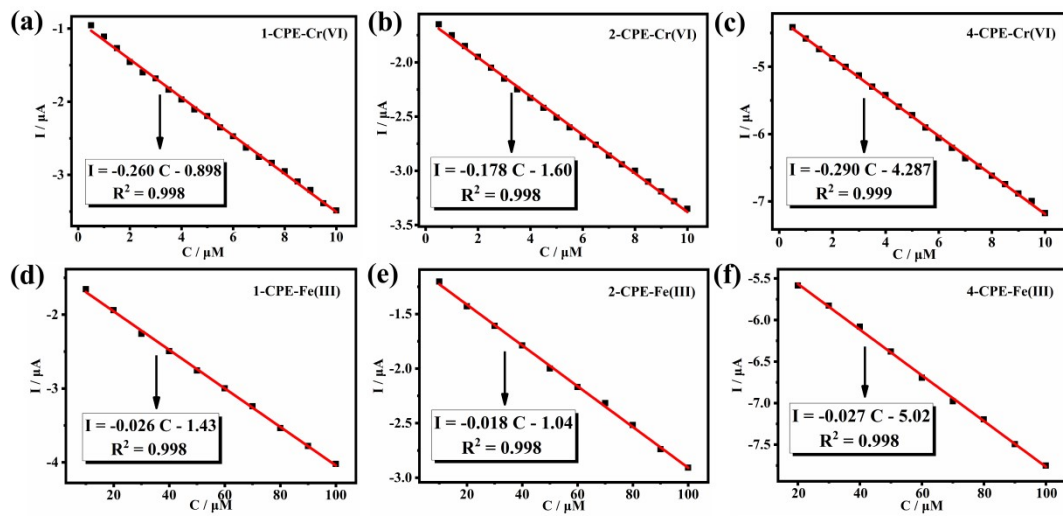

**Fig. S12.** Linear relationship between concentrations of Cr(VI), Fe(III) and redox currents of 1-, 2-, 4-CPE.



**Table S4** Comparison of complexes **1–4** with other reported sensors for the determination of Cr(VI).

| Sensors' materials                                                                                                                                            | Method | Sensitivity<br>( $\mu\text{Am M}^{-1}$ ) | LOD<br>( $\mu\text{M}$ ) | Reference |
|---------------------------------------------------------------------------------------------------------------------------------------------------------------|--------|------------------------------------------|--------------------------|-----------|
| 1                                                                                                                                                             | i-t    | 260                                      | $3.31 \times 10^{-3}$    | this work |
| 2                                                                                                                                                             | i-t    | 178                                      | $9.08 \times 10^{-3}$    | this work |
| 3                                                                                                                                                             | i-t    | 244                                      | $6.06 \times 10^{-4}$    | this work |
| 4                                                                                                                                                             | i-t    | 290                                      | $2.85 \times 10^{-3}$    | this work |
| $[\text{HC}_5\text{H}_6\text{N}_2]_6\{\text{M}[\text{Mo}_6\text{O}_{12}(\text{OH})_3(\text{HPO}_4)_3(\text{H}_2\text{PO}_4)_2]_2\} \cdot n\text{H}_2\text{O}$ | i-t    | 224                                      | 0.026                    | 2         |
| $(\text{H}_2\text{bpp})_6\{\text{GdMo}^{\text{V}}_2\text{Mo}^{\text{VI}}_{16}\text{O}_{49}(\text{HPO}_4)_3(\text{PO}_4)_3\}_2 \cdot 11\text{H}_2\text{O}$     | i-t    | 151                                      | 0.202                    | 3         |
| $(\text{H}_2\text{bpp})_2[\text{Na}_4\text{Fe}(\text{H}_2\text{O})_7][\text{Fe}(\text{P}_4\text{Mo}_6\text{O}_{31}\text{H}_6)_2] \cdot 2\text{H}_2\text{O}$   | i-t    | 117                                      | 0.174                    | 4         |
| $[\text{Cu}^{\text{II}}_4(\text{btmc})(\text{ctcm})_4(\beta\text{-Mo}_8\text{O}_{26})] \cdot [\beta\text{-Mo}_8\text{O}_{26}] \cdot \text{H}_2\text{O}$       | i-t    | 15.54                                    | 0.074                    | 5         |
| NiFe-NPs                                                                                                                                                      | i-t    | 35.5                                     | 0.01                     | 6         |
| Ti/TiO <sub>2</sub> NT/Au                                                                                                                                     | i-t    | 6.91                                     | 0.03                     | 7         |

**Table S5** Comparison of **1–4** with other reported sensors for the determination of Fe(III).

| Sensors' materials                                                                                        | Method | Sensitivity<br>( $\mu\text{Am M}^{-1}$ ) | LOD<br>( $\mu\text{M}$ ) | Reference |
|-----------------------------------------------------------------------------------------------------------|--------|------------------------------------------|--------------------------|-----------|
| 1                                                                                                         | i-t    | 26                                       | 0.033                    | this work |
| 2                                                                                                         | i-t    | 18                                       | 0.089                    | this work |
| 3                                                                                                         | i-t    | 77                                       | 0.019                    | this work |
| 4                                                                                                         | i-t    | 27                                       | 0.031                    | this work |
| $\{[\text{H}_2\text{N}(\text{CH}_3)_2][\text{Co}_2(\text{BDC})\text{SO}_4\text{F}(\text{H}_2\text{O})]\}$ | CV     | -                                        | 0.1                      | 8         |
| SMS-2                                                                                                     | DPV    | $7.33 \times 10^{-4}$                    | 0.93                     | 9         |
| PEDOT-DFA nanowires                                                                                       | CV     | -                                        | 0.01                     | 10        |

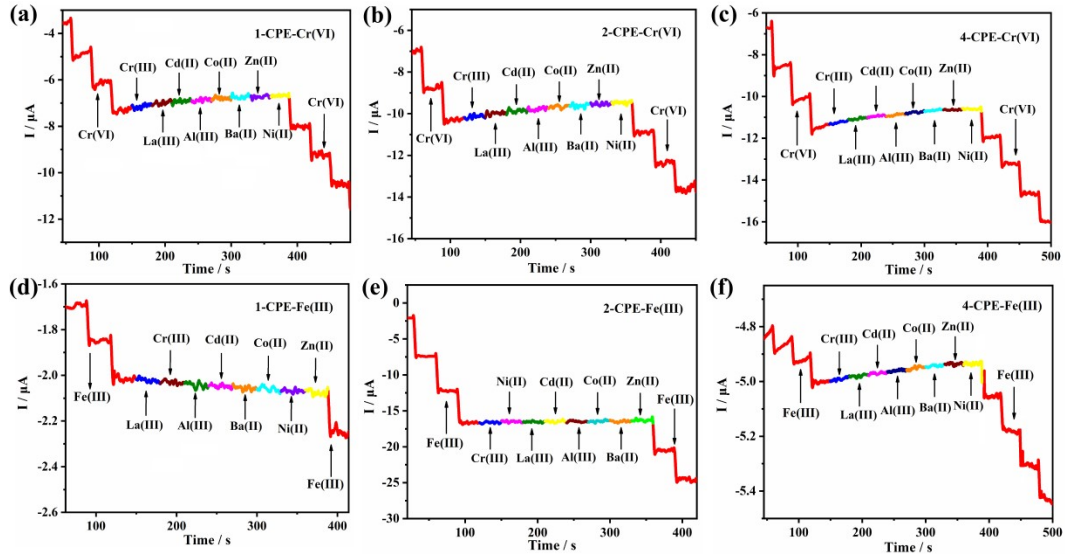

**Fig. S13.** Current response of 1-, 2-, 4-CPE contains Cr(VI) (a-c) and Fe(III) ions (d-f) with continuous addition of various metal ions ( $100 \mu\text{M Cr}^{3+}$ ,  $\text{Al}^{3+}$ ,  $\text{Cd}^{2+}$ ,  $\text{La}^{3+}$ ,  $\text{Ba}^{2+}$ ,  $\text{Co}^{2+}$ ,  $\text{Ni}^{2+}$ ,  $\text{Zn}^{2+}$ ).

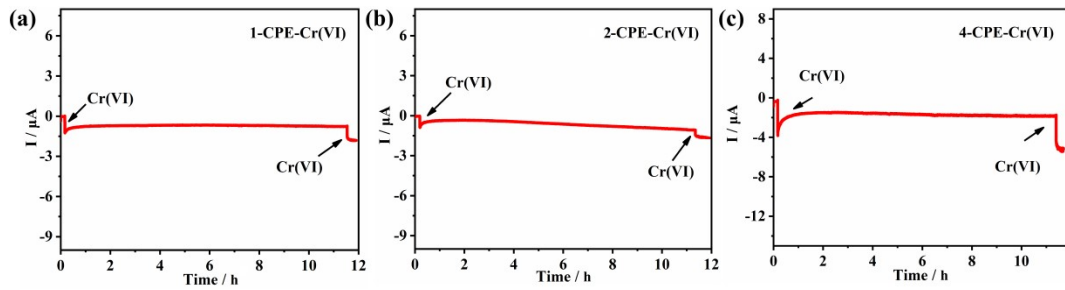

**Fig. S14.** The stabilities of 1, 2, 4-CPE to the amperometric response of  $10 \mu\text{M Cr(VI)}$  for 10 h.

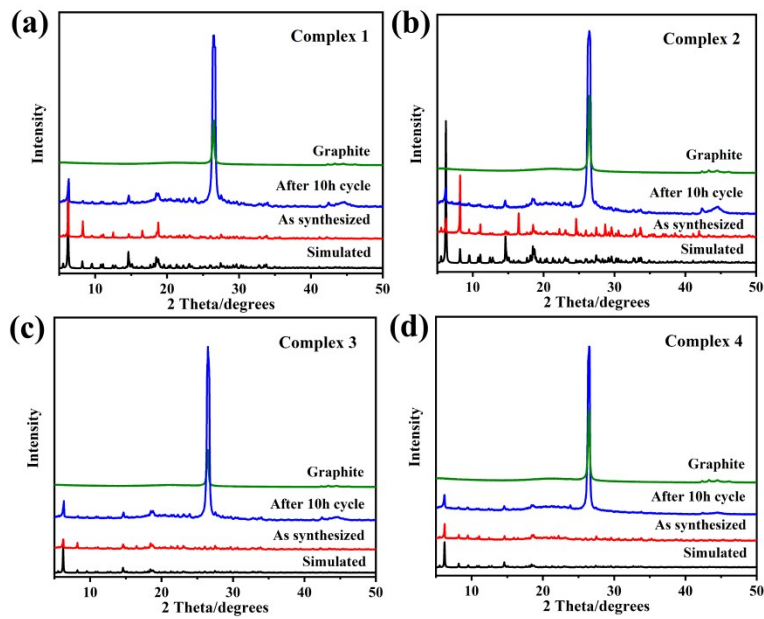

**Fig. S15.** The PXRD of 1-4-CPEs after working 10 h.

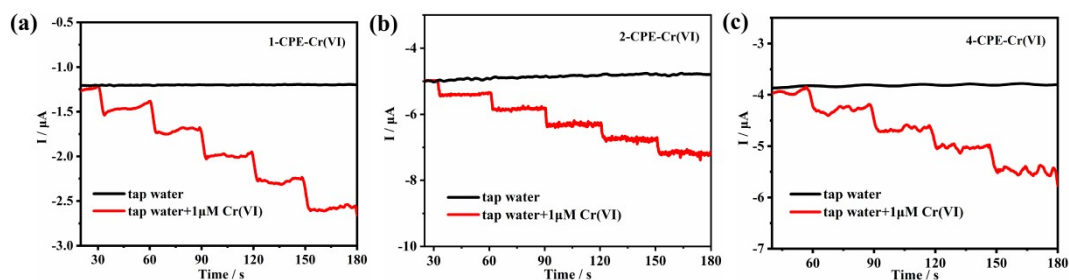

**Fig. S16.** Current response of 1-, 2-, 4-CPE to detects trace Cr(VI) in tap water samples.

## Reference

1. J. Wang, Y. S. Liu, X. Y. Guo, H. Q. Qu, R. Chang and J. Ma, Efficient Adsorption of Dyes Using Polyethyleneimine-Modified  $\text{NH}_2\text{-MIL-101(Al)}$  and its Sustainable Application as a Flame Retardant for an Epoxy Resin, *ACS Omega*, 2020, **5**, 32286-32294.
2. Y. L. Wang, Y. Y. Ma, Q. Zhao, L. Hou and Z. G. Han, Polyoxometalate-Based Crystalline Catalytic Materials for Efficient Electrochemical Detection of Cr(VI), *Sensors and Actuators B: Chemical*, 2020, **305**, 127469-127489.
3. J. Q. Niu, Y. Y. Ma, X. Xin, Z. G. Han, Rare-Earth Ion Encapsulated Basket-like  $\{\text{GdP}_6\text{Mo}^{\text{V}}_2\text{Mo}^{\text{VI}}_{16}\text{O}_{73}\}$  Cage as Efficient Electrochemical Sensor and Fluorescent Probe for Cr(VI), *Crystal Growth & Design*, 2020, **20**, 3584-3589.
4. X. Xin, N. Hu, Y. Y. Ma, Y. L. Wang, L. Hou, H. Zhang and Z. G. Han. Polyoxometalate-based crystalline materials as a highly sensitive electrochemical sensor for detecting trace Cr(VI), *Dalton Transactions*, 2020, **49**, 4570-4577.
5. C. Wang, J. Ying, H. C. Mou, A. X. Tian and X. L. Wang, Multi-functional Photoelectric Sensors based on A Series of Isopolymolybdate-based Compounds for Detecting Different Ions, *Inorganic Chemistry Frontiers*, 2020, **7**, 3882-3894.
6. J. Liu, D. Yu, L. Ji, Z. Xin and W. Wang, Highly sensitive detection of Cr(VI) in ground water by bimetallic NiFe nanoparticles, *Analytical Methods*, 2017, **9**, 1031-1037.
7. W. Jin, G. S. Wu and A. C. Chen, Sensitive and selective electrochemical detection of chromium(VI) based on gold nanoparticle-decorated titania nanotube arrays, *Analyst*, 2013, **139**, 235-241.
8. L. Y. Pang, P. Wang, J. J. Gao, Y. Wen, H. Liu, An active metal-organic anion framework with highly exposed  $\text{SO}_4^{2-}$  on  $\{001\}$  facets for the enhanced electrochemical detection of trace  $\text{Fe}^{3+}$ , *Journal of Electroanalytical Chemistry*, 2019, **836**, 85-93.

9. S. K. Mittal, S. Rana, N. Kaur and C. E. Banks. Voltammetric Method for Fe (III) in Blood Serum using Screen Printed Electrode modified with a Schiff Base ionophore, *Analyst*, 2018, **143**, 2851-2861.
10. L. R. Kindra, C. J. Eggers, A. T. Liu, K. Mendoza, J. Mendoza, A. R. Klein Myers, R. M. Penner, Lithographically Patterned PEDOT Nanowires for the Detection of Iron(III) with Nanomolar Sensitivity, *Analytical Chemistry*, 2015, **87**, 11492-500.
